# Supplementary material
Source: PubMed Central journal article supplement (PMC6119118)
Supplement: NIHMS967904-supplement-3.pdf [file NIHMS967904-supplement-3.pdf]

# Supplementary Materials for

## Genomic Correlates of Response to Immune Checkpoint Blockade in Microsatellite-Stable Solid Tumors

Diana Miao, Claire A. Margolis, Natalie I. Vokes, David Liu, Amaro Taylor-Weiner, Stephanie M. Wankowicz, Dennis Adeegbe, Daniel Keliher, Bastian Schilling, Adam Tracy, Michael Manos, Nicole G. Chau, Glenn J. Hanna, Paz Polak, Scott J. Rodig, Sabina Signoretti, Lynette M. Sholl, Kwok-Kin Wong, Jeffrey A. Engelman, Gad Getz, Pasi A. Jänne, Robert I. Haddad, Toni K. Choueiri, David A. Barbie, Kwok-Kin Wong, Rizwan Haq, Mark M. Awad, Dirk Schadendorf, F. Stephen Hodi, Joaquim Bellmunt, Peter Hammerman, Eliezer M. Van Allen

correspondence to: [Eliezerm\\_vanallen@dfci.harvard.edu](mailto:Eliezerm_vanallen@dfci.harvard.edu)

### **This PDF file includes:**

Supplementary Tables 3, 6, & 8

### **Other Supplementary Materials for this manuscript include the following:**

Supplementary Tables 1-2, 4-5, 7, 9-10

**Supplementary Table 1.** Sequencing metrics and inclusion/exclusion criteria for whole exome sequencing from N=314 clinically annotated patient tumors

**Supplementary Table 2.** Clinical outcomes and clinical covariates for N=249 patients

**Supplementary Table 3.** Clinical stratification of immunotherapy-treated patients from three published studies

| <b>Objective Response/Clinical Benefit</b> | <b>No response/No Clinical Benefit</b> | <b>Other</b>                                | <b>Source</b>         |
|--------------------------------------------|----------------------------------------|---------------------------------------------|-----------------------|
| CR/PR by RECIST                            | PD by RECIST                           | SD by RECIST                                | Hugo et al. 2016      |
| CR/PR<br>SD with PFS > 6 months            | PD<br>SD with PFS < 6 months           | NA                                          | Roh et al. 2017       |
| CR/PR by RECIST<br>SD with OS > 12 months  | PD by RECIST<br>SD with OS < 12 months | Long-term survival:<br>PD with OS > 2 years | Van Allen et al. 2015 |

**Supplementary Table 4.** Oncogenes and tumor suppressors assessed for driver mutations

**Supplementary Table 5.** All mutations (somatic single nucleotide variants and small insertions and deletions) across N=249 tumors included in analysis

**Supplementary Table 6.** Mutational signatures and proposed etiologies (Alexandrov et al. *Nature* 2013).

| <b>Mutational signature</b> | <b>Proposed signature etiology</b> |
|-----------------------------|------------------------------------|
| <b>S1</b>                   | Aging                              |
| <b>S2</b>                   | APOBEC                             |
| <b>S3</b>                   | Homologous repair defect           |
| <b>S4</b>                   | Tobacco smoking                    |
| <b>S5</b>                   | Unknown                            |
| <b>S6</b>                   | DNA mismatch repair defect         |
| <b>S7</b>                   | UV                                 |
| <b>S8</b>                   | Unknown                            |
| <b>S9</b>                   | Polymerase $\eta$                  |
| <b>S10</b>                  | POLE mutation                      |
| <b>S11</b>                  | Alkylating                         |
| <b>S12</b>                  | Unknown                            |
| <b>S13</b>                  | APOBEC                             |

|                |                            |
|----------------|----------------------------|
| <b>S14</b>     | Unknown                    |
| <b>S15</b>     | DNA mismatch repair defect |
| <b>S16-S19</b> | Unknown                    |
| <b>S20</b>     | DNA mismatch repair defect |
| <b>S21</b>     | Unknown                    |
| <b>S22</b>     | Aristolochic acid          |
| <b>S23</b>     | Unknown                    |
| <b>S24</b>     | Aflatoxin                  |
| <b>S25</b>     | Unknown                    |
| <b>S26</b>     | DNA mismatch repair defect |
| <b>S27-S28</b> | Unknown                    |
| <b>S29</b>     | Tobacco chewing            |
| <b>S30</b>     | Unknown                    |

**Supplementary Table 7.** Mutational signature activity across all tumors

**Supplementary Table 8.** Oncogenes and tumor suppressors assessed for amplifications or deletions

**Gene**

- CBL
- RAD50
- TGFBR2
- MSH6
- KMT2D
- PBRM1
- ARID2
- ASXL2
- CDH1
- EP300
- TP53
- SMAD2
- SMAD4
- FBXW7
- CDKN1A
- CDKN1B
- CDKN2A
- ASXL1
- BRIP1
- ERCC4
- RBM10

TSC1  
TSC2  
FOXA1  
ARID1A  
BAP1  
FANCA  
KMT2C  
FAT1  
ARID1B  
PIK3R1  
MLH1  
KMT2A  
KDM6A  
VHL  
PMS2  
PPM1D  
APC  
MSH2  
XRCC2  
CREBBP  
SETD2  
CTCF  
TET1  
SMARCA4  
ATM  
SOX9  
TET2  
ATRX  
CDK12  
B2M  
GATA3  
CCND1  
KEAP1  
PTCH1  
PTEN  
BCOR  
PRDM1  
JAK1  
STK11  
NF1  
PTPRD  
BRCA1  
BRCA2

NF2

BCL10

HNF1A

RASA1

RB1

CASP8

**Supplementary Table 9.** Copy number alterations across all tumors

**Supplementary Table 10.** Predicted HLA-restricted neoantigens across all tumors
